# Supplementary material
Source: PubMed Central journal article supplement (PMC8741649)
Supplement: NIHMS1734839-supplement-1.pdf [file NIHMS1734839-supplement-1.pdf]

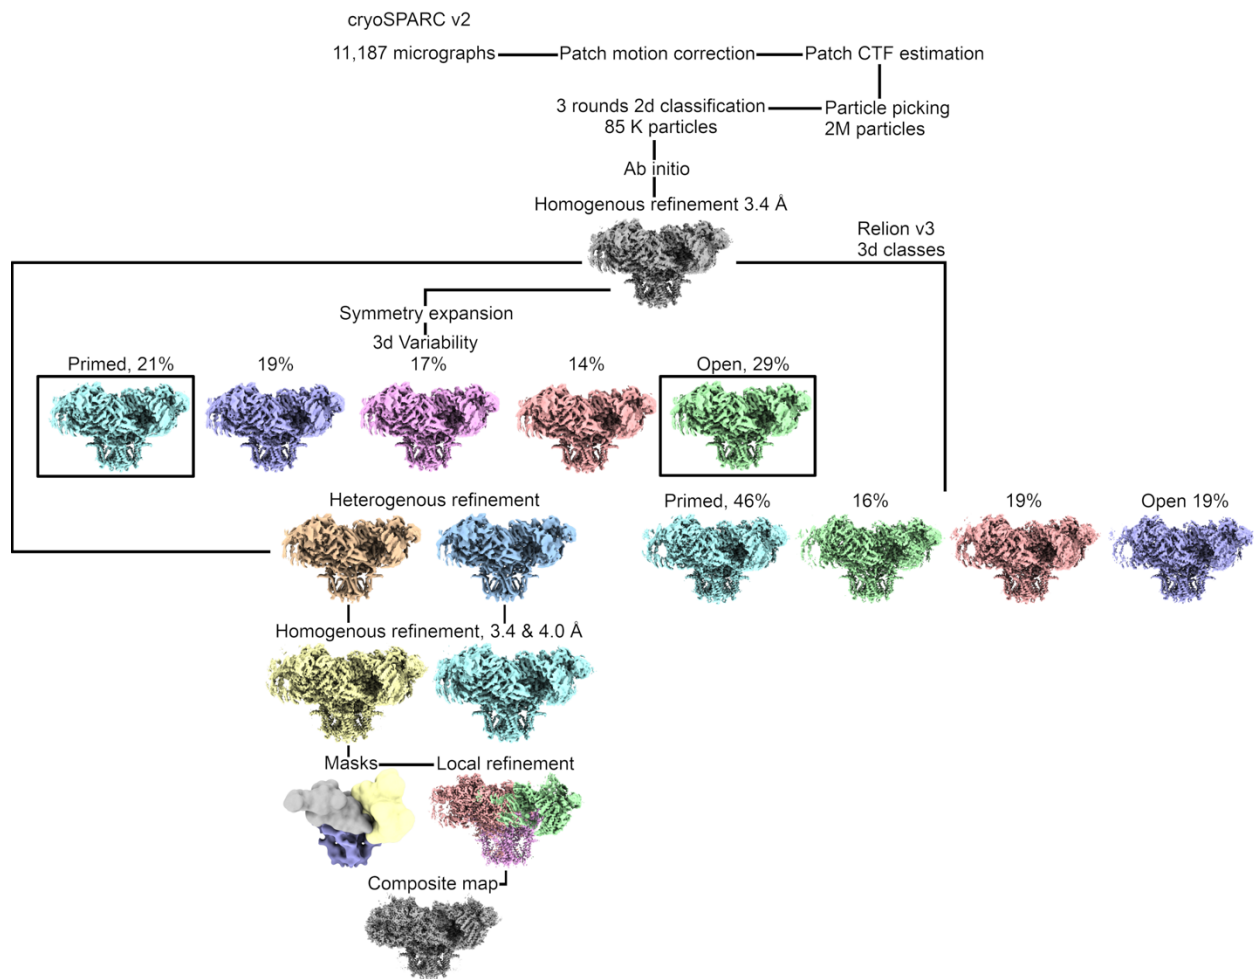

**Figure S1.** Data processing workflow. Processing of proteoliposomal RyR1 was performed in cryoSPARC with 3d classification in Relion. Related to STAR Methods.

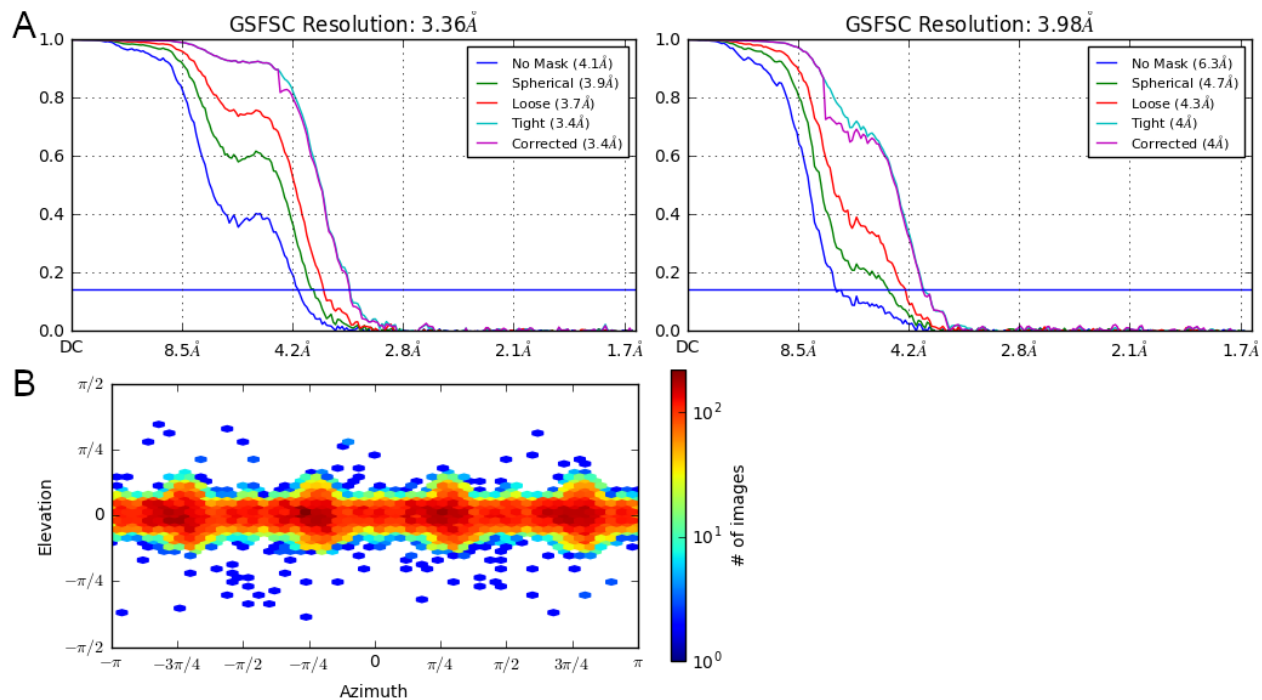

**Figure S2.** GSFSCs and viewing angle distributions. A. GSFSC curves of proteoliposomal RyR1 in the primed (left) and open (right) states. B. Viewing angle distributions of proteoliposomal RyR1. Related to STAR Methods.
